# Supplementary material for: Disinfecting Action of Gaseous Ozone on OXA-48-Producing Klebsiella pneumoniae Biofilm In Vitro
Source: MDPI journal article supplement (doi:10.3390/ijerph19106177), 2022-05-19
Supplement: s1 [file s1]

# Disinfecting Action of Gaseous Ozone on OXA-48-Producing *Klebsiella pneumoniae* Biofilm In Vitro

Kaća Piletić <sup>1</sup>, Bruno Kovač <sup>1</sup>, Marko Perčić <sup>2</sup>, Jure Žigon <sup>3</sup>, Dalibor Broznić <sup>4</sup>, Ljerka Karleuša <sup>5</sup>, Sanja Lučić Blagojević <sup>6</sup>, Martina Oder <sup>7</sup> and Ivana Gobin <sup>1,\*</sup>

- <sup>1</sup> Department of Microbiology and Parasitology, Faculty of Medicine, University of Rijeka, 51000 Rijeka, Croatia; kaca.piletic@student.uniri.hr (K.P.); bruno.kovac@student.uniri.hr (B.K.)  
<sup>2</sup> Faculty of Engineering & Centre for Micro- and Nanosciences and Technologies, University of Rijeka, 51000 Rijeka, Croatia.; marko.percic@uniri.hr  
<sup>3</sup> Department of Wood Science and Technology, Biotechnical Faculty, University of Ljubljana, 1000 Ljubljana, Slovenia; jure.zigon@bf.uni-lj.si  
<sup>4</sup> Department of Medical Chemistry, Biochemistry and Clinical Chemistry, Faculty of Medicine, University of Rijeka, 51000 Rijeka, Croatia; dalibor.broznic@uniri.hr  
<sup>5</sup> Department of Physiology and Immunology, Faculty of Medicine, University of Rijeka, 51000 Rijeka, Croatia; ljerka.karleusa@uniri.hr  
<sup>6</sup> Faculty of Chemical Engineering and Technology, University of Zagreb, 10000 Zagreb, Croatia; slucic@fkit.hr  
<sup>7</sup> Department of Sanitary Engineering, Faculty of Health Sciences, University of Ljubljana, 1000 Ljubljana, Slovenia; martina.oder@zf.uni-lj.si  
\* Correspondence: ivana.gobin@uniri.hr

**Table S1.** Antibiotic resistance/sensitivity pattern of the *K. pneumoniae* isolates.

| Isolate                    | Kp strain14                                       | Kp strain 15 | Kp strain 16 | Kp strain 33 | Kp strain 34 | KpATCC 700603 | KpNCTC 13442 |
|----------------------------|---------------------------------------------------|--------------|--------------|--------------|--------------|---------------|--------------|
| Specimen                   | Urine                                             | Urine        | Urine        | Blood        | Urine        | Urine         | Unknown      |
| Antibiotics                | Susceptibilities of <i>K. pneumoniae</i> isolates |              |              |              |              |               |              |
| AMX                        | R                                                 | R            | R            | R            | R            | R             | R            |
| AMX-C                      | R                                                 | R            | R            | R            | R            | R             | R            |
| TZP                        | R                                                 | R            | R            | R            | R            | S             | R            |
| CEX                        | R                                                 | R            | R            | R            | R            | R             | R            |
| CXM                        | R                                                 | R            | R            | R            | R            | R             | R            |
| CRO                        | R                                                 | R            | R            | R            | R            | R             | S            |
| CAZ                        | R                                                 | R            | R            | R            | R            | R             | R            |
| CDP                        | R                                                 | R            | R            | R            | R            | R             | R            |
| CFIX                       | R                                                 | R            | R            | R            | R            | R             | S            |
| CFMP                       | R                                                 | R            | R            | R            | R            | R             | S            |
| IMP                        | R                                                 | S            | I            | R            | I            | S             | S            |
| MEM                        | R                                                 | I            | R            | R            | R            | I             | R            |
| ETP                        | R                                                 | R            | R            | R            | R            | S             | R            |
| GEN                        | R                                                 | S            | R            | R            | R            | R             | S            |
| AMK                        | S                                                 | S            | S            | R            | S            | S             | S            |
| NRFX                       | R                                                 | R            | R            | R            | R            | S             | R            |
| CIX                        | R                                                 | R            | R            | R            | R            | I             | R            |
| SXT                        | R                                                 | R            | R            | R            | R            | R             | R            |
| TC                         | R                                                 | R            | R            | S            | R            | R             | R            |
| COL                        | S                                                 | S            | S            | R            | S            | S             | S            |
| COL                        |                                                   |              |              |              |              |               |              |
| MIC microdilution<br>µg/mL | 0.500                                             | 0.250        | 0.500        | 64.00        | 0.250        | 0.500         | 0.125        |

AMX – amoxicilin, AMX-C – amoxicilin clavulanic acid, AMP – ampicilin, TZP – piperacilin tazobactam, CEX – cephalixin, CXM – cefuroxime, CRO – ceftriaxone, CAZ – ceftazidime, CDP – cefpodoxime, CFIX – cefixime, CFMP – cefepime, IMP – imipenem, MEM – meropenem, ETP – ertapenem, GEN – gentamicin, AMK – amikacin, CIX – ciprofloxacin, NRFX – norfloxacin, SXT – sulfamethoxazole trimethoprim, TC – tigecycline, COL – colistin, S – sensitive, I – sensitive with prolonged exposure, R – resistant, MIC – minimal inhibitory concentration

**Table S2.** Biofilm inhibition of all *K. pneumoniae* strains. Results are shown in percentages (%).

| <b>Bacteria</b>           | <b>%Kp<br/>strain 14</b> | <b>%Kp<br/>strain 15</b> | <b>%Kp<br/>strain 16</b> | <b>%Kp<br/>strain 33</b> | <b>%Kp<br/>strain 34</b> | <b>%Kp<br/>ATCC<br/>700603</b> | <b>%Kp<br/>NCTC<br/>13442</b> |
|---------------------------|--------------------------|--------------------------|--------------------------|--------------------------|--------------------------|--------------------------------|-------------------------------|
| <b>CFU/cm<sup>2</sup></b> | 97.8                     | 98.88                    | 98.73                    | 98.66                    | 99.09                    | 99.36                          | 99.76                         |
| <b>RLU</b>                | 78.36                    | 79.79                    | 84.76                    | 75.85                    | 76.23                    | 85.93                          | 88.15                         |
| <b>A/600nm</b>            | 40.98                    | 38.72                    | 35.87                    | 48.61                    | 44.11                    | 22.14                          | 34.07                         |
